# Supplementary material for: Improved Efficiency and Reliability of NGS Amplicon Sequencing Data Analysis for Genetic Diagnostic Procedures Using AGSA Software
Source: Hindawi journal article supplement (doi:10.1155/2016/5623089), 2016-01-01

Supplementary Figure 1

**A**

**B**

| 351-218 |            |       |                |              |         |            |              |                  |                                 |          |           |            |            |           |             |          |            |
|---------|------------|-------|----------------|--------------|---------|------------|--------------|------------------|---------------------------------|----------|-----------|------------|------------|-----------|-------------|----------|------------|
| Gene    | Amplicon   | Depth | Position in A. | Annotation   | Variant | Homopolym. | % of variant | % of variant ... | Frequency per orientation (F/R) | homo/het | P. Alt    | CodingEff. | SIFTpredi. | Reads pr. | IdTranscrit | Homopol. | Validation |
| BRCA1   | BR_0010    | 91    | 3591.0         | c.68-7del    | T>-     | 10         | 61           | 83               | 3/18(16.67%) / 23/24(95.83%)    | Hetero   | p.7       |            |            | true      | NM_0000     | Hist.    |            |
| BRCA1   | BR_0008    | 95    | 10743.0        | c.476-20del  | T>-     | 4          | 18           | 31               | 2/20(10.00%) / 8/35(22.86%)     | Hetero   | p.7       |            |            | true      | NM_0000     | Hist.    |            |
| BRCA1   | BR_0006    | 95    | 10754.0        | c.476-9del   | T>-     | 7          | 33           | 64               | 16/19(84.21%) / 2/35(5.71%)     | Hetero   | p.7       |            |            | true      | NM_0000     | Hist.    |            |
| BRCA1   | BR_0007    | 119   | 10996.0        | c.517-24del  | A>-     | 1          | 72           | 97               | 14/37(37.84%) / 73/83(87.95%)   | Hetero   | p.7       |            |            | true      | NM_0000     | Hist.    |            |
| BRCA1   | BR_0010_04 | 88    | 17812.0        | c.1813del    | A>-     | 8          | 35           | 87               | 29/34(85.29%) / 2/54(3.70%)     | Hetero   | p.Ile605T | Frameshift |            | true      | NM_0000     | Hist.    |            |
| BRCA1   | BR_0011_06 | 90    | 22736.1        | c.3860dup    | ->A     | 7          | 64           | 83               | 3/14(21.43%) / 28/34(82.35%)    | Hetero   | p.Asn128  | Frameshift |            | true      | NM_0000     | Hist.    |            |
| BRCA1   | BR_0011_08 | 90    | 22521.0        | c.3645del    | G>-     | 4          | 18           | 68               | 7/16(43.75%) / 2/34(5.88%)      | Hetero   | p.Phe121  | Frameshift |            | true      | NM_0000     | Hist.    |            |
| BRCA1   | BR_0011_07 | 85    | 22739.0        | c.3863del    | A>-     | 2          | 22           | 54               | 3/44(6.82%) / 16/41(39.02%)     | Hetero   | p.Asn128  | Frameshift |            | true      | NM_0000     | Hist.    |            |
| BRCA1   | BR_0011_05 | 35    | 23045.1        | c.4169dup    | ->T     | 6          | 16           | 62               | 5/18(27.78%) / 1/18(5.56%)      | Hetero   | p.Leu139  | Frameshift |            | true      | NM_0000     | Hist.    |            |
| BRCA1   | BR_0011_10 | 114   | 23469.0        | c.4593del    | A>-     | 6          | 48           | 79               | 2/12(16.67%) / 53/63(84.13%)    | Hetero   | p.Val153  | Frameshift |            | true      | NM_0000     | Hist.    |            |
| BRCA1   | BR_0011_09 | 18    | 24965.0        | c.6089del    | A>-     | 4          | 17           | 4                | 2/12(16.67%) / 2/11(18.18%)     | Hetero   | p.Asn203  | Frameshift |            | true      | NM_0000     | Hist.    |            |
| BRCA1   | BR_0014_03 | 132   | 39771.0        | c.7397T>C    | T>C     | 1          | 100          | 97               | 56/56(100.00%) / 76/76(100.00%) | Homo     | p.Ala246  | synonym... |            | true      | NM_0000     | Hist.    |            |
| BRCA1   | BR_0017    | 91    | 47033.0        | c.7806-11del | T>-     | 4          | 15           | 14               | 9/46(19.57%) / 5/46(10.87%)     | Hetero   | p.7       |            |            | true      | NM_0000     | Hist.    |            |
| BRCA1   | BR_0018    | 66    | 47868.1        | c.8145dup    | ->A     | 5          | 15           | 22               | 7/29(24.14%) / 3/36(8.33%)      | Hetero   | p.Val271  | Frameshift |            | true      | NM_0000     | Hist.    |            |
| BRCA1   | BR_0018    | 66    | 47744.1        | c.8021dup    | ->A     | 6          | 32           | 27               | 20/20(66.67%) / 1/35(2.86%)     | Hetero   | p.Ile267S | Frameshift |            | true      | NM_0000     | Hist.    |            |
| BRCA1   | BR_0020    | 46    | 55452.1        | c.8488-25d.  | ->T     | 1          | 29           | 79               | 10/14(71.43%) / 4/34(11.76%)    | Hetero   | p.7       |            |            | true      | NM_0000     | Hist.    |            |
| BRCA1   | BR_0022    | 79    | 64029.0        | c.8946del    | A>-     | 5          | 30           | 70               | 22/32(68.75%) / 2/46(4.35%)     | Hetero   | p.Asp29   | Frameshift |            | true      | NM_0000     | Hist.    |            |
| BRCA1   | BR_0023    | 95    | 64414.1        | c.9097dup    | ->A     | 8          | 18           | 33               | 9/25(36.00%) / 1/30(3.33%)      | Hetero   | p.Thr303  | Frameshift |            | true      | NM_0000     | Hist.    |            |

Save Exit

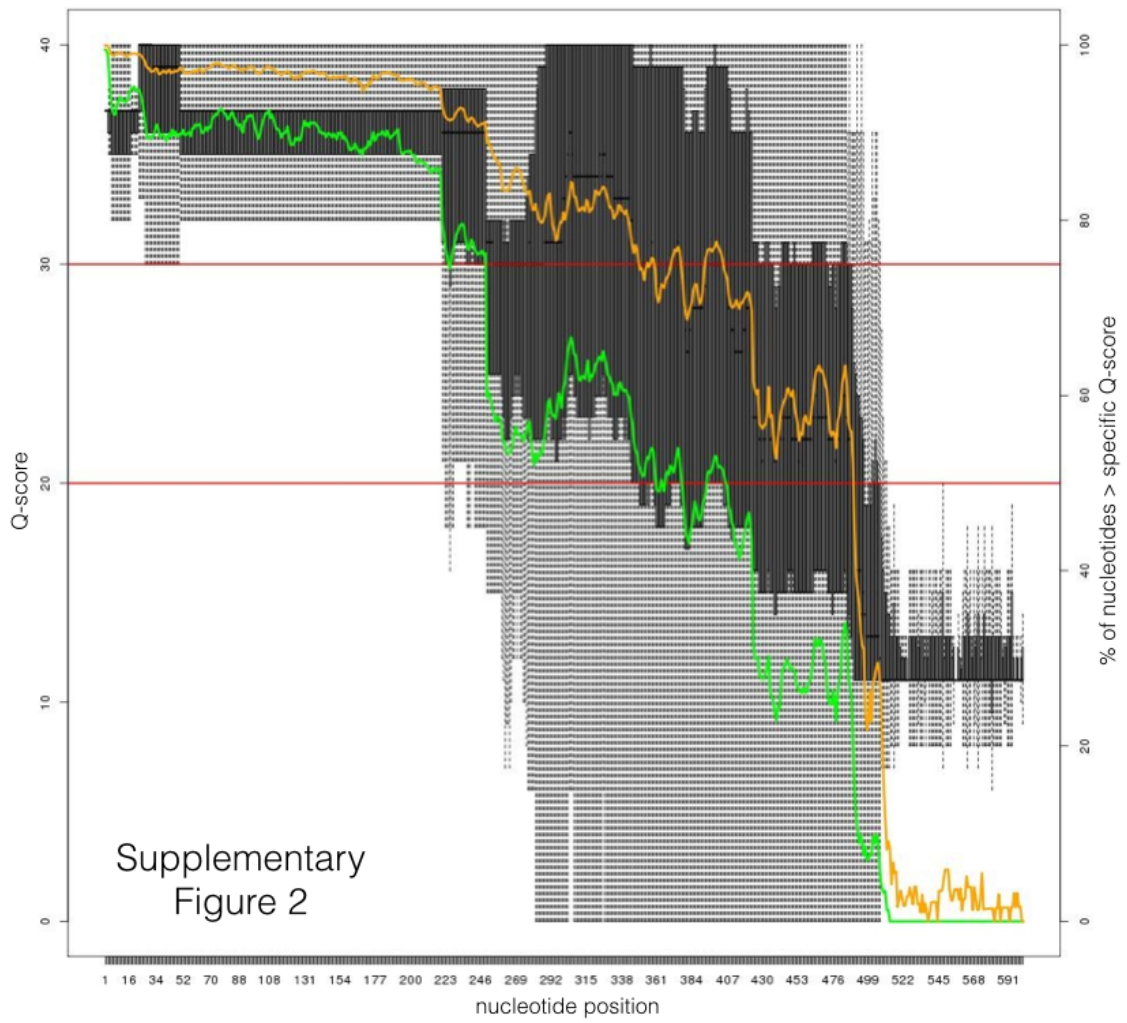

Supplementary  
Figure 3

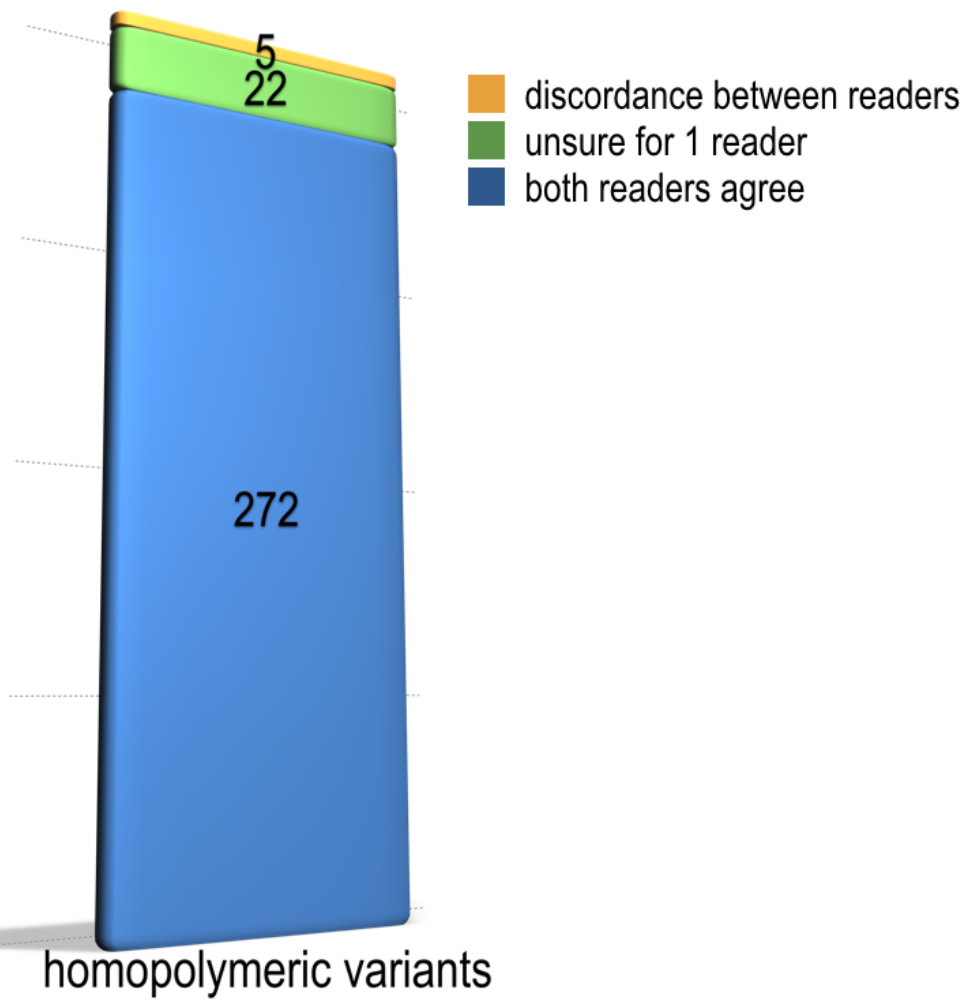

Supplementary  
Figure 4

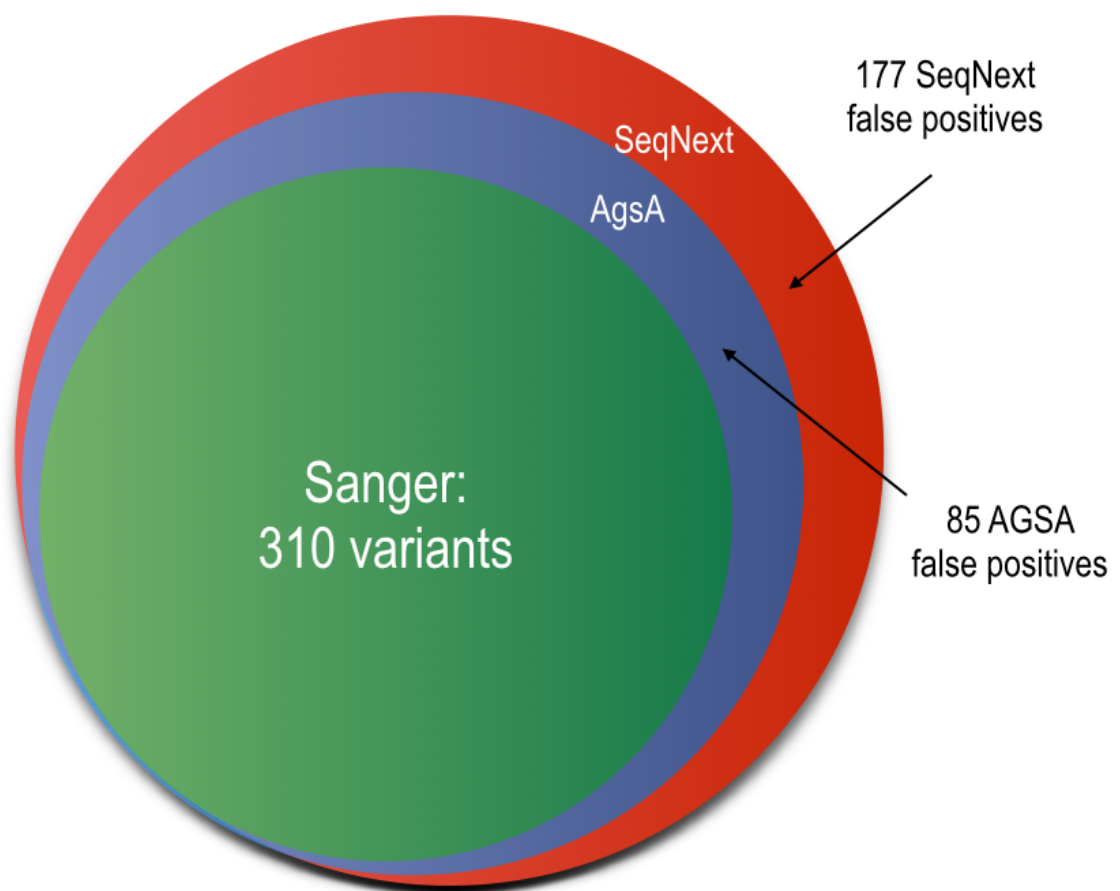

Supplement: f1 [file 5623089.f1.pdf]
